# Supplementary material
Source: PubMed Central journal article supplement (PMC4788467)

**a**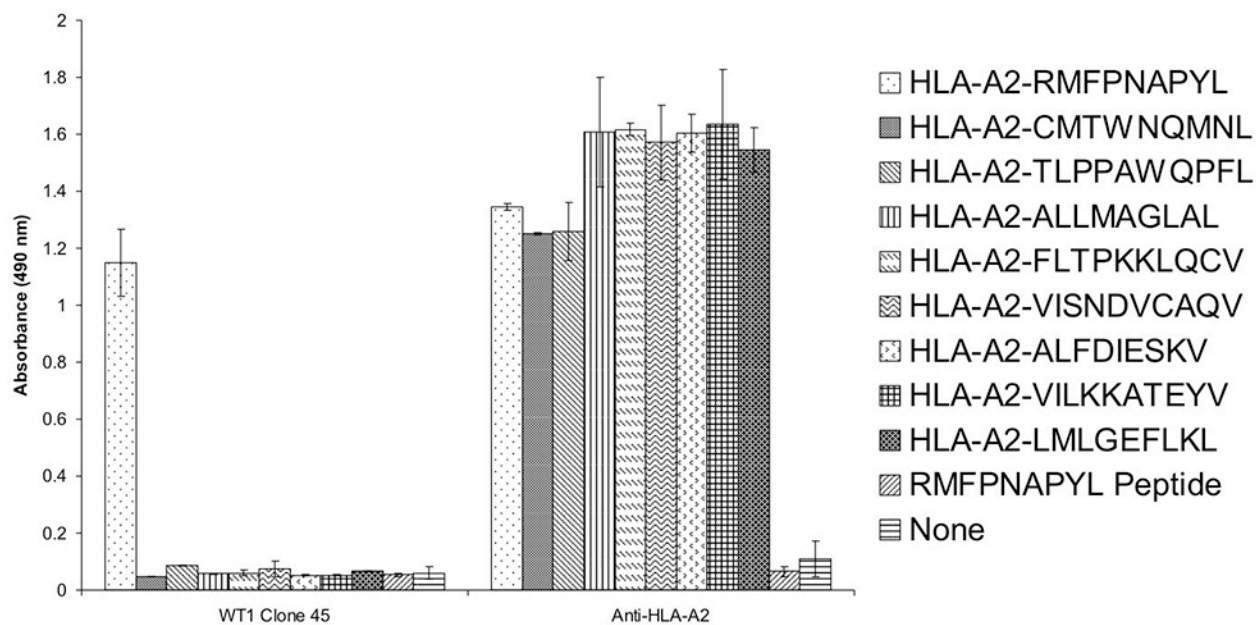**b**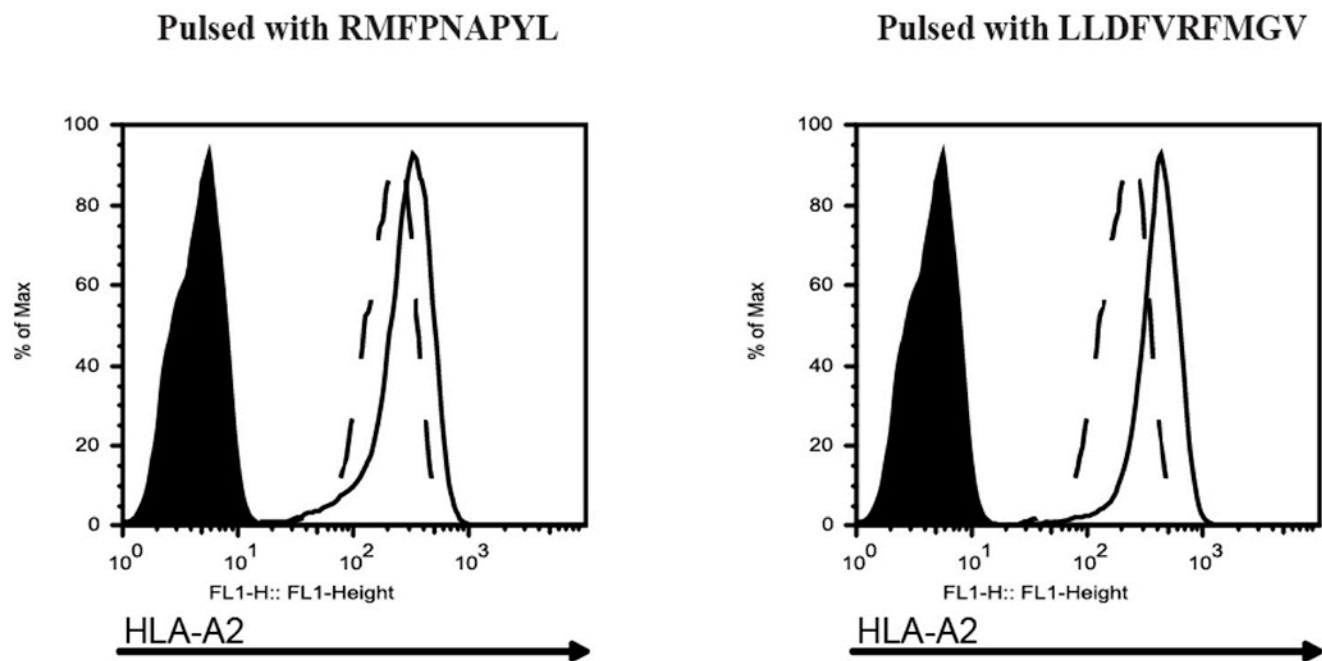**c**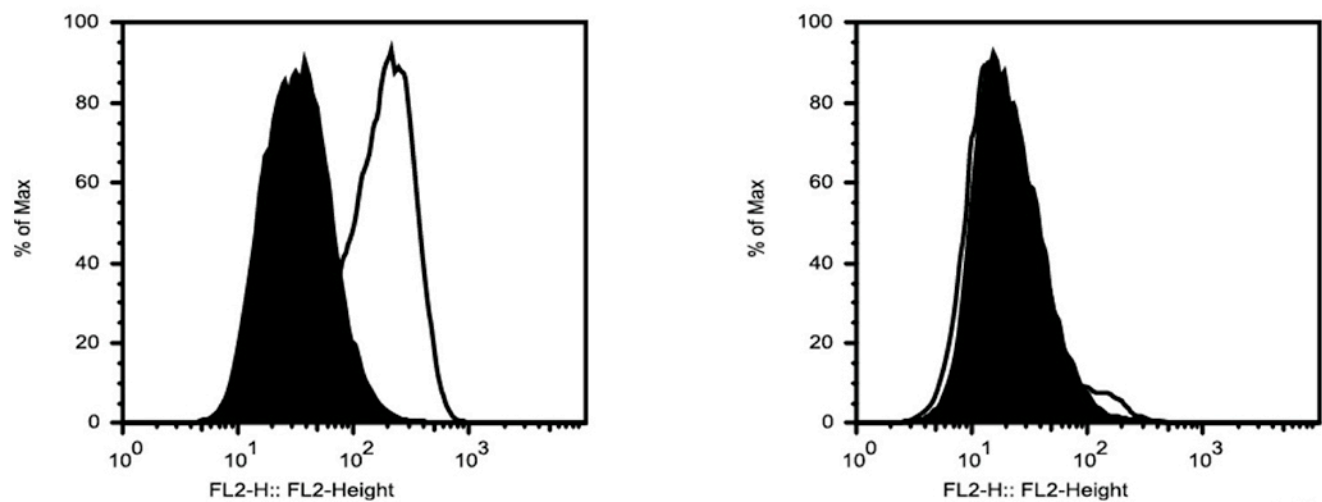**Fig. S1**

Supplement: NIHMS715139-supplement-Figure_1S.pdf [file NIHMS715139-supplement-Figure_1S.pdf]

**S3.1**

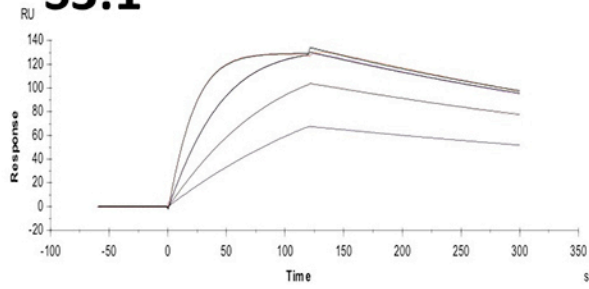

**S3.3**

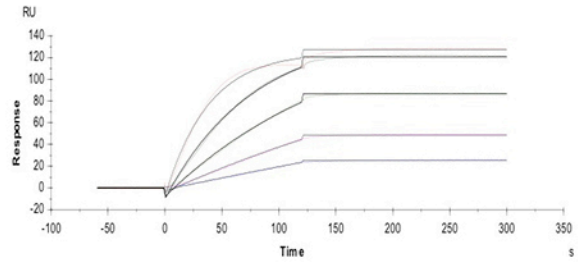

**S3.6**

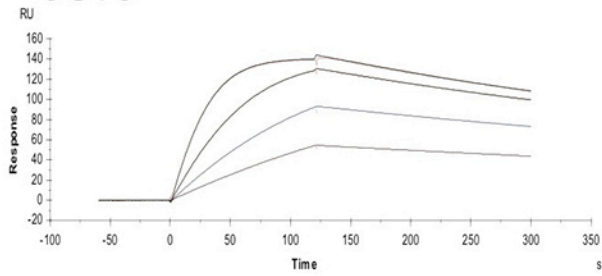

**Clone45**

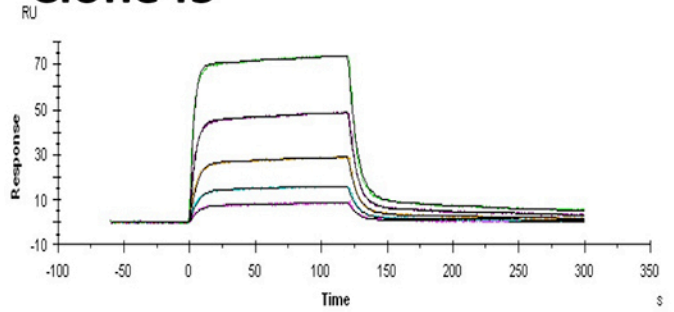

**Q2L**

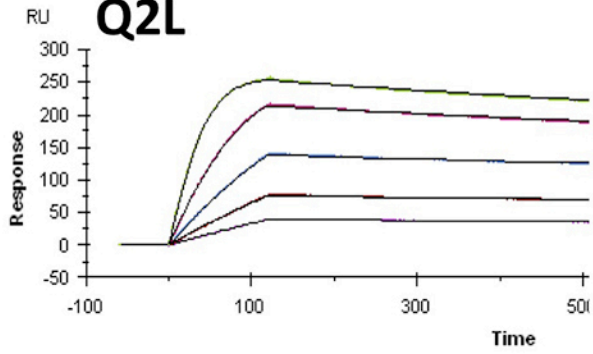

**Fig. S2**

Supplement: NIHMS715139-supplement-Figure_2S.pdf [file NIHMS715139-supplement-Figure_2S.pdf]

**a**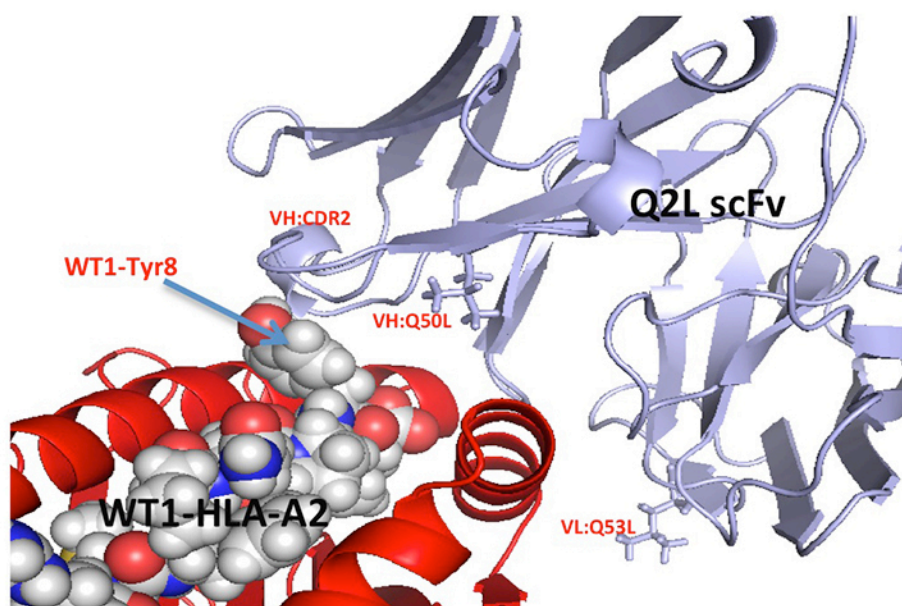**b**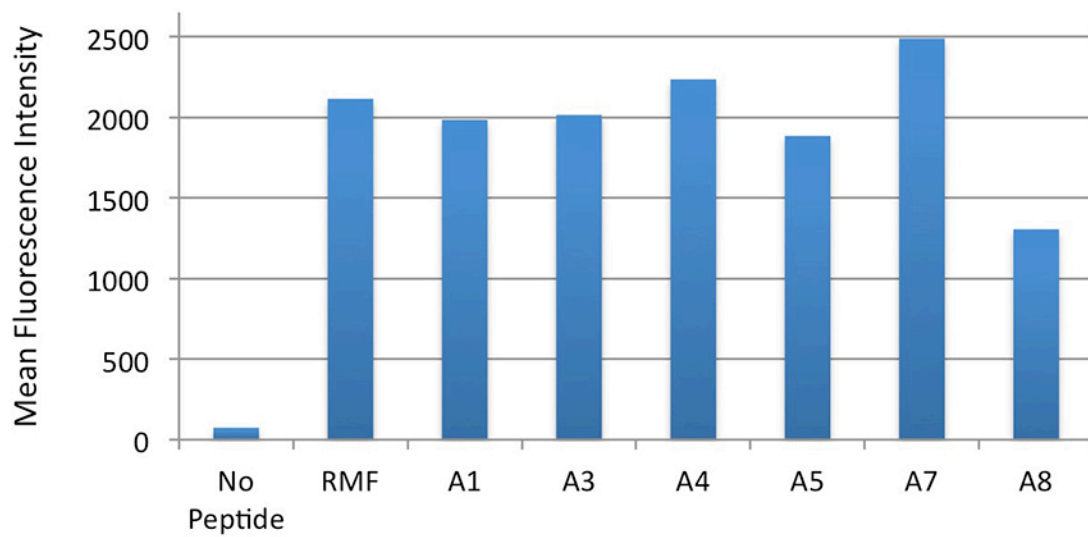**Fig. S3**

Supplement: NIHMS715139-supplement-Figure_3S.pdf [file NIHMS715139-supplement-Figure_3S.pdf]

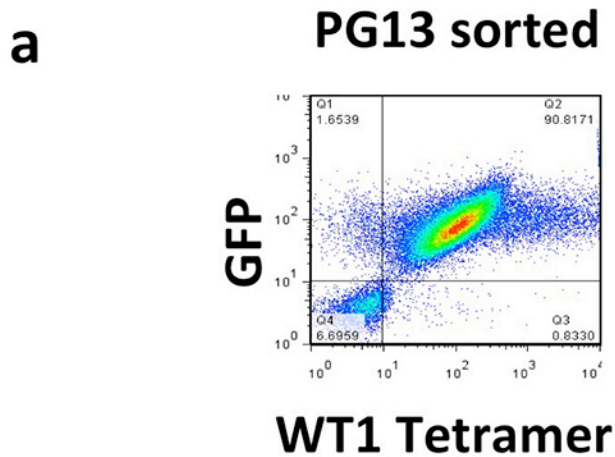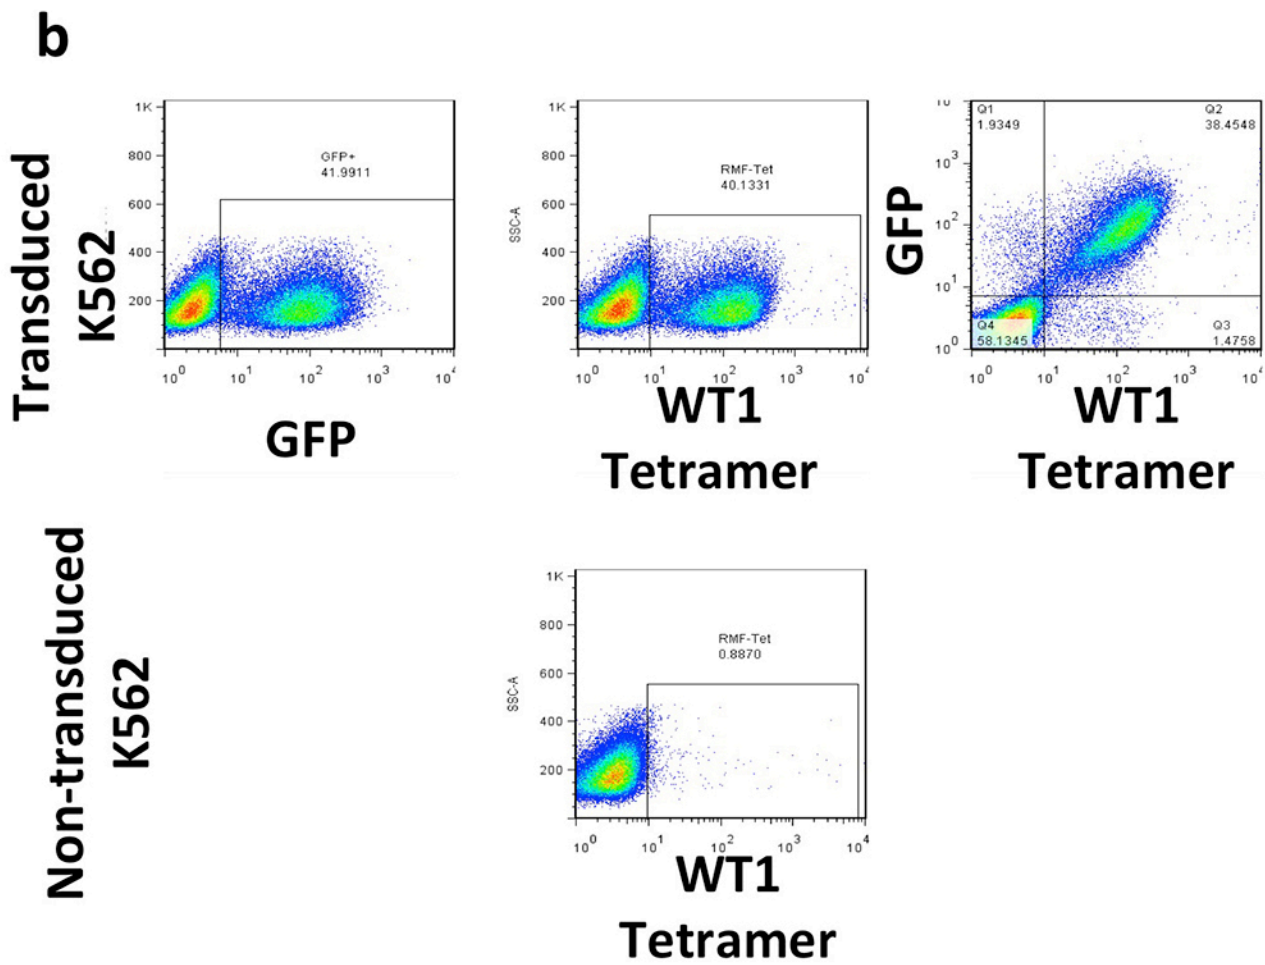

**Fig. S4**

Supplement: NIHMS715139-supplement-Figure_4S.pdf [file NIHMS715139-supplement-Figure_4S.pdf]
